1     **Association of IL-6 -174G/C and IL-10- 1082G/A Polymorphisms and Risk of**  
2     **Chronicity of Hepatitis B Infection in Sudanese End Stage Renal Disease**  
3     **Patients**

4                                     Omer B. Mohamedsalih<sup>1</sup>, Waleed A. Hussain<sup>2\*</sup>

5     <sup>1</sup> *Department of Molecular biology, Faculty of Medical Laboratory Sciences*

6     *Alneelain University, Khartoum- Sudan.*

7     <sup>2</sup> *Department of Immunology and Molecular biology, Faculty of Medical Laboratory Sciences*

8     *Alneelain University, Khartoum- Sudan.*

9     \*Corresponding author: Waleed Abdelateif Hussain

10    [waleed.86h@gmail.com](mailto:waleed.86h@gmail.com)

11    +249912257223

12    *Department of Immunology and Molecular biology, Faculty of Medical Laboratory Sciences*

13    *Alneelain University, Khartoum- Sudan.*

14

15    **Abstract**

16    **Background:** Overt hepatitis B virus (HBV) infection is defined as infection with detectable  
17    surface antigen (HBsAg) in patient's blood. End stage renal disease (ESRD) patients who are on  
18    maintenance hemodialysis (HD) are considered to be strong candidates for HBV infection due to  
19    prolonged vascular access via HD procedure. In addition, the differences in host immune response  
20    can be one of the reasons for the various clinical presentations of HBV infection. Polymorphisms  
21    of genes encoding the pro-inflammatory and anti-inflammatory cytokines, which are responsible  
22    for regulation of the immune response, can affect the clinical presentation of the infection.  
23    Particularly, the polymorphisms of the genes encoding cytokines such as interleukin 6 (IL6) and  
24    interleukin 10 (IL10).

25    **Aim:** This current study aimed to compare serum levels and allelic variant of IL-6 -174G/C and  
26    IL-10- 1082G/A polymorphisms in patients with overt hepatitis B and end stage renal disease  
27    hepatitis B patients in Khartoum State- Sudan.

28    **Method:** Case control study has been conducted to detect the IL-6 -174G/C and IL-10- 1082G/A  
29    polymorphisms using SSP-PCR and serum level of IL6 and IL10 using ELISA in 68 from  
30    Hepatitis B patient (37 overt hepatitis B patients and 31 end stage renal disease hepatitis B patients

31 **Result:** The result showed that there was no statistically difference in IL6 (174G/C) and IL10  
32 (1082G/A) Allelic frequencies (P. value = .738, .194 respectively), Serum level (P. value = 0.36,  
33 .179 respectively) between two groups. In addition there is no significant correlation between the  
34 IL6 (174G/C) and IL10 (1082G/A) and serum level in study groups.

35 **Conclusion:** The Allelic Variant of IL-6 -174G/C and IL-10- 1082G/A Polymorphisms and  
36 serum levels could not play apart in complication of hepatitis B in end stage renal disease  
37 patients.

38 **Keywords:** IL-6 -174G/C, IL-10- 1082G/A, Polymorphisms, End Stage Renal Disease, Chronic  
39 Hepatitis B, Khartoum, Sudan.

40  
41  
42  
43  
44  
45  
46  
47  
48  
49  
50  
51  
52  
53  
54  
55  
56  
57  
58  
59  
60  
61

## 62 **Introduction**

63 Hepatitis B virus (HBV) is a hepatotropic, small, enveloped DNA virus that belongs to the  
64 Hepadnaviridae family and causes an acute or chronic infection in humans. Chronic hepatitis B  
65 virus (HBV) infection represents a major global health problem, affecting an estimated 257-291  
66 million persons worldwide and is associated with substantial morbidity and mortality because of  
67 clinical complications, such as liver cirrhosis and hepatocellular carcinoma [1].

68 In Sudan a recent systematic review and meta-analysis including 14 studies with 5848  
69 participants have been conducted, revealing that HBV seroprevalence rates ranged from 5.1 to  
70 26.8% with an overall pooled prevalence of 12.1%. According to study findings, Khartoum State  
71 had the highest prevalence of HBV infection in Sudan with a proportion of 12.7% [2].

72 Among many groups susceptible to HBV infection, patients with end-stage renal disease  
73 (ESRD) who are on maintenance haemodialysis (HD) are considered to be strong candidates for  
74 HBV infection due to prolonged vascular access via HD procedure at HD units where the  
75 nosocomial transmission of this virus is well documented (Ayatollahi, 2016) [3]. In addition, the  
76 impaired immune response of HD patients puts this population under serious risk of Hepatitis B  
77 [4].

78 Unlike the appearance of this infection in immune-competent individuals, HBV infection  
79 usually tends to be chronic in HD patients due to the immunosuppressive nature of ESRD [5].  
80 Chronic HBV infection has three distinct states of chronicity, which can be differentiated  
81 serologically. The first one is chronic Hepatitis B characterized by detectable HBsAg in the serum  
82 for six months or more known as overt Hepatitis B. The second is an inactive HBV carrier in which  
83 the HBsAg is detectable in the serum with negative HBeAg. The third one is an unusual clinical  
84 entity known as occult Hepatitis B infection (OBI) [6].

85 The challenges in the area of HBV-associated disease like ESRD are the dearth of  
86 knowledge in predicting outcome and progression of HBV infection and need to understand them  
87 molecular, cellular, immunological, and genetic basis of assorted disease manifestations related to  
88 HBV infection. The differences in host immune response can be one of the reasons for the various  
89 clinical presentations of HBV infection. Polymorphisms of genes encoding the pro-inflammatory  
90 and anti-inflammatory cytokines, which are responsible for regulation of the immune response,  
91 can affect the clinical presentation of the infection. Particularly, the polymorphisms of the genes  
92 encoding cytokines such as interleukin IL-6 and IL-10 [7].

## 93 **Material and methods**

### 94 **Study design and Sample collection**

95 A case control study was conducted at Khartoum state, Sudan. Blood specimen from chronic  
96 hepatitis B patient (37 overt hepatitis B patients as control group and 31 end stage renal disease  
97 hepatitis B patients as case group) was collected in EDTA Containers and store at -20 °c until  
98 processing.

### 99 **Laboratory work**

#### 100 **DNA extraction**

101 The DNA was extracted from 300 µl of blood sample using (G-spin™  
102 Total DNA Extraction Mini Kit, intron biotechnology – Korea) according to manufacture  
103 instruction.

#### 104 **Determination of DNA quality and purity**

105 Part of the DNA solution mixed with loading dye 5 in 1 and DNA quality and purity  
106 determined using gel electrophoresis. DNA transferred into 1 ml Eppendorf tube [8].

107 **DNA storage:** DNA was transferred into 1ml Eppendorf tube and preserved at -20°C until PCR  
108 process.

#### 109 **Polymerase chain**

#### 110 **Interleukin-6 (-174G/C) and Interleukin-10(-1082 G/A) genotyping**

111 The SSP-PCR (sequence-specific primer-polymerase chain reaction) method applied for  
112 genotyping; PCR mixture of 20 µl prepared from master mix tubes (5X FIREPOL®, Solis bioDyne  
113 – Estonia) for each sample. Genomic DNA amplified in two different PCRs for each  
114 polymorphism; each reaction employed ageneric antisense primer and one of the two allele-  
115 specific sense primers (see table 3.1, 3.2). To assess the success of PCR amplification in both  
116 reactions. The PCR reaction carried out in a Thermal Cycler (Techne, UK), with the following  
117 programs: 1min at 95C followed by 35 cycles of 30 sec at 95°C, 30 sec at 58°C, 30 sec at 72°C,  
118 with 5min at 72°C as final extension [9].

119 for Interleukin-10 genotyping , 1min at 95C followed by 35 cycles of 30 sec at 95°C, 30  
120 sec at 55.5°C, 30 sec at 72°C, with 5min at 72°C as final extension for Interleukin-6 genotyping  
121 [8].

122

123

124

125

126 **Table (1) Primer Sequences Used for the IL-6 SSP Genotyping Method:**

| Primer position    | Primer sequence                     | Product size |
|--------------------|-------------------------------------|--------------|
| IL6(-174) C primer | 5'-CCC CTA GTT GTG TCT TGC C-3'     | 240bp        |
| IL6(174) G primer  | 5'-CCC CTA GTT GTG TCT TGC G-3'     | 240bp        |
| IL6 Generic        | 5'-GCC TCA GAG ACA TCA CCA GTC C-3' | 240bp        |

127

128 **Table (2) Primer Sequences Used for the IL-10 SSP Genotyping Method:**

| Primer position        | Primer sequence             | Product size |
|------------------------|-----------------------------|--------------|
| IL-10 common (reverse) | 5'-CAGCCCTTCCATTTTACTTTC-3' | 550 bp       |
| IL-10 G (forward)      | 5'-TACTAAGGCTTCTTTGGGAG-3'  | 550 bp       |
| IL-10 A (forward)      | 5'-CTACTAAGGCTTCTTTGGGAA-3' | 550bp        |

130 **Demonstration of PCR product:**

131 Five µl of the PCR product (ready to load) was electrophoresed on 1.5% agarose gel, and stained  
132 with ethidium bromide, 1X TBE buffer will be used as a running buffer. The Voltage applied to  
133 the gel will be 100 volt with time duration of 30 minutes. 100 pb DNA ladder will be used as  
134 molecular weight marker with each patch of samples Finally, PCR product will be demonstrated  
135 by gel documentation system [8].

136 **IL10 and IL6 serum level estimation**

137 Patients serum were tested for the presence of IL-6 and IL-10 using commercially available ELISA  
138 sets for human IL-10 (ELISA MAX Standard set, #430601, BioLegend), IL-6 (ELISA MAX  
139 Standard set, #430501, BioLegend), following the protocols supplied by the manufacturers.

140 **Data analysis:**

141 The data analyzed using the SPSS computer program version 21. Independent sample – T.  
142 Test was used to determine the difference in genotype frequencies among study groups, the mean

143 and stander deviation was applied for Serum level and ANOVA test with mean to correlate the  
144 genotype frequencies and serum level. The data presented in tables and figures.

## 145 **Result**

146 In the present study we compare Serum levels and Allelic Variant of IL-6 -174G/C and IL-  
147 10- 1082G/A Polymorphisms in 31 Patients with Overt Hepatitis B and 37 End Stage Renal  
148 Disease Hepatitis B patients. The study was carried out in Khartoum state in Sudan.

149 Table 4.1 show that there was no statistically difference in IL6 (174G/C) Genotypes (CC,  
150 CG and GG) frequencies between overt Hepatitis B patients and end stage renal disease (ESRD)  
151 hepatitis B patients (P. value = 0.738).

152 Table 4.2 show that there was no statistically difference in IL10 (1082G/A) Genotypes  
153 (AA, GG and GA) frequencies between overt Hepatitis B patients and end stage renal disease  
154 hepatitis B patients (P. value = 0.194).

155 Table 4.3 show that there was no statistically difference in IL6 serum levels between overt  
156 Hepatitis B patients and end stage renal disease hepatitis B patients (P. value = 0.36)

157 Table 4.4 show that there was no statistically difference in IL10 serum levels between overt  
158 Hepatitis B patients and end stage renal disease hepatitis B patients (P. value = 0.179).

159 Table 4.5 show that there was no statistically significant correlation between IL6  
160 (174G/C) and serum level in Overt Hepatitis B patients and end stage renal disease hepatitis B  
161 patients (P. value = 0.536, 0.449 respectively).

162 Table 4.6 show that there was no statistically significant correlation between IL10  
163 (1082G/A) and serum level in Overt Hepatitis B patients and Overt Hepatitis B patients (P. value  
164 = 0.092, 0.229 respectively).

165

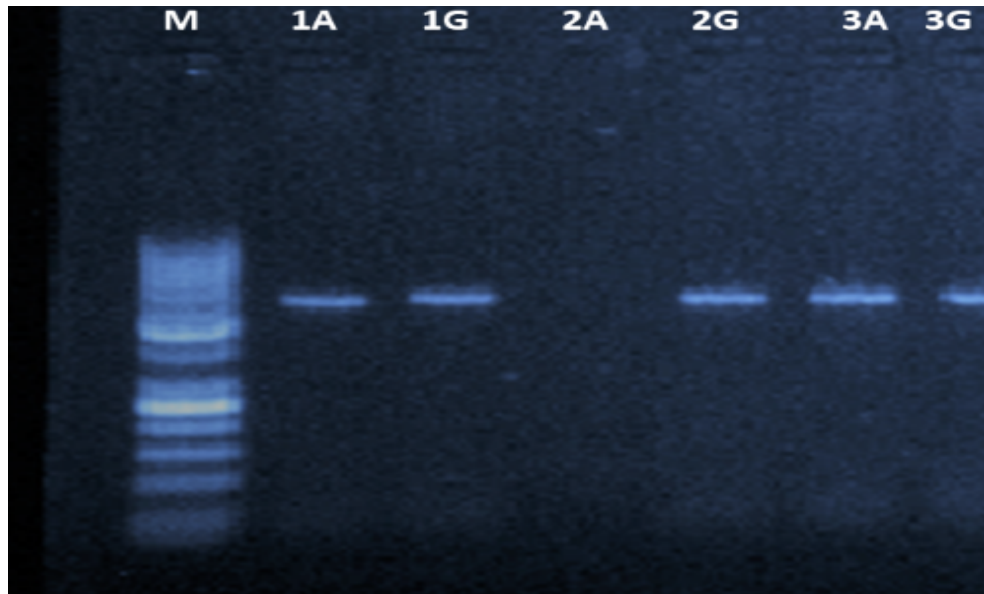

166

167 **Figure 4.1:** A representative Agarose (2%) gel electrophoresis of SS-PCR product (550bp) for  
168 genotyping of Interleukin-10(-1082 G/A); M: 50bp DNA marker, Lane 1, 3: represent  
169 Heterozygous mutant individuals (GA), Lane 2: represent Homozygous mutant individual (AA).

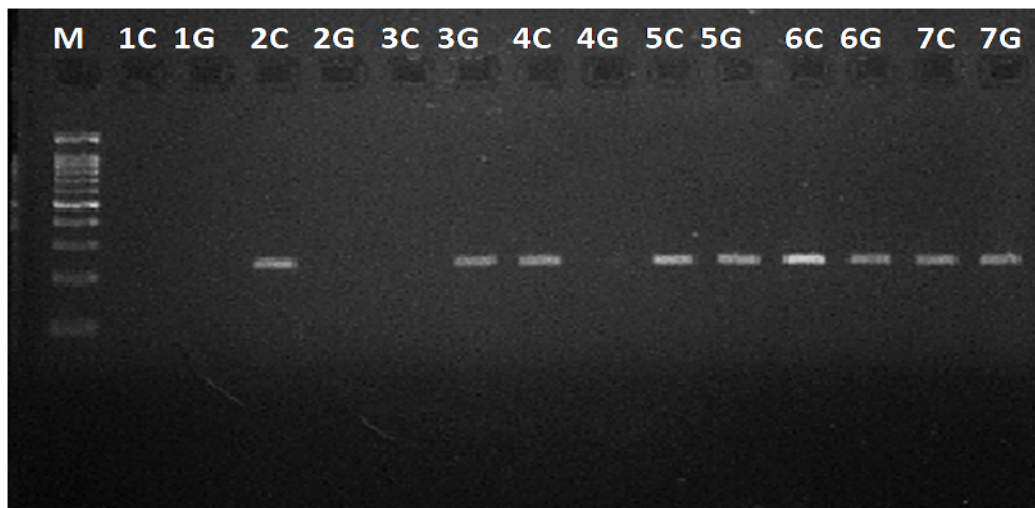

170

171 **Figure 4.2:** A representative Agarose (2%) gel electrophoresis of SS-PCR product (200bp) for  
172 genotyping of Interleukin-6 (-174G/C); M: 100bp DNA marker, lane 1: represent invalid sample,  
173 Lane 2, 4: represent Homozygous mutant individuals (CC), lane3: represent Homozygous wild  
174 individual (GG) and lane5, 6, 7: represent Heterozygous mutant (GC).

175

176

177 **Table 4.1 IL6 (174G/C) Genotypes frequencies among study groups.**

| Study groups               | IL6 Genotype frequency |             |             | Total        | P. value |
|----------------------------|------------------------|-------------|-------------|--------------|----------|
|                            | CC                     | GG          | GC          |              |          |
| ESRD Hepatitis B patients  | 5<br>(16%)             | 11<br>(36%) | 15<br>(48%) | 31<br>(100%) | 0.738    |
| Overt Hepatitis B patients | 6<br>(16%)             | 15<br>(41%) | 16<br>(43%) | 37<br>(100%) |          |

178

179 **Table 4.2 IL10 (1082G/A) Genotypes frequencies among study groups.**

| Study groups               | IL10 Genotype frequency |             |             | Total        | P. value |
|----------------------------|-------------------------|-------------|-------------|--------------|----------|
|                            | AA                      | GG          | GA          |              |          |
| ESRD Hepatitis B patients  | 4<br>(13%)              | 19<br>(61%) | 8<br>(26%)  | 31<br>(100%) | 0.194    |
| Overt Hepatitis B patients | 2<br>(5%)               | 21<br>(67%) | 14<br>(38%) | 37<br>(%)    |          |

180 **Table 4.3 IL6 Serum Level among study groups.**

| Study groups               | IL6 Serum Level<br>(Mean ± STD) | P. value |
|----------------------------|---------------------------------|----------|
| ESRD Hepatitis B patients  | 15.390 ±18                      | 0.36     |
| Overt Hepatitis B patients | 9.325 ±10                       |          |

181

182 **Table 4.4 IL10 Serum Level among study groups.**

| Study groups               | Serum Level<br>(Mean ± STD) | P. value |
|----------------------------|-----------------------------|----------|
| ESRD Hepatitis B patients  | 6.304 ± 4                   | 0.179    |
| Overt Hepatitis B patients | 3.670 ±6                    |          |

183



184 **Table 4.5 Correlation between IL6 (174G/C) polymorphisms and serum level in study**  
185 **groups.**

186

187

188

189

190

| Study groups               | IL6 Serum Level<br>(Mean ± STD) |         |         | P. value |
|----------------------------|---------------------------------|---------|---------|----------|
|                            | CC                              | GG      | GC      |          |
| ESRD Hepatitis B patients  | 5.2 ±5                          | 11.7±14 | 8.5±8.2 | .449     |
| Overt Hepatitis B patients | 6.8± 9                          | 18± 20  | 16±19   | .536     |

191 **Table 4.5 Correlation between IL10 (1082G/A) polymorphisms and serum level in study**  
192 **groups.**

| Study groups               | IL10 Serum Level<br>(Mean ± STD) |          |           | P. value |
|----------------------------|----------------------------------|----------|-----------|----------|
|                            | CC                               | GG       | GC        |          |
| ESRD Hepatitis B patients  | 11± 13                           | 3.5 ±5.4 | 2.8± 6.2  | .229     |
| Overt Hepatitis B patients | 2.70 ± 1.9                       | 6 ± 4.7  | 8.7 ± 4.1 | .092     |

## 194 **Discussion**

195 Hepatitis B virus (HBV) infection commonly induces immune reactive inflammation,  
196 which results in continuous liver tissue damage and progression of liver fibrosis to cirrhosis or  
197 hepatocellular carcinoma especially in immunocompromised patients like End stage renal disease  
198 patients [10].

199 Cytokines and particularly IL6 and IL10 are key regulatory elements of innate immunity  
200 against HBV infection and can affect the stage of disease. Immune dysfunction and the impaired  
201 hepatitis B vaccination response are complications of chronic renal failure that are tightly  
202 associated with inflammation induced by uremia and blood-membrane contacts [11].

203 Interleukin IL-6 are counter regulated by IL-10 with a large inter-individual variability.  
204 Part of the variability of cytokine production is genetically determined since polymorphisms in the  
205 cytokine gene promoters lead to high or low production [12].

206 The aim of this study was to compare Allelic variant of IL-6 -174G/C and IL-10- 1082G/A  
207 Polymorphisms and their serum levels in patients with overt hepatitis B and end stage renal Disease  
208 hepatitis B patients in Khartoum State- Sudan, the result illustrated that the Allelic Variant of IL-  
209 6 -174G/C and IL-10- 1082G/A Polymorphisms could not play apart in complication of chronic  
210 Hepatitis B in End stage renal disease patients, this finding is similar to meta- analysis by Ye Feng  
211 et al who conclude that the IL-6 -174G/C polymorphism has no significant correlation with the  
212 susceptibility risk of ESRD, and may not be a risk factor for ESRD [13].

213 Also Buckham et al. and Kandil et al. suggest that, there is no correlation between IL-6  
214 gene polymorphism and ESRD [14, 15].

215 In return regarding the role of IL-6 -174G/C polymorphism in Chronic hepatitis B (CHB)  
216 and HBV related liver disease the meta-analysis done by Chang Lei et al illuminated that the IL-6  
217 -174G/C polymorphism did not play part in susceptibility to CHB [16].

218 In regard to the influence of IL-10- 1082G/A Polymorphisms on immune function of CHB  
219 the study by Zhang et al showed no significant difference between IL-10- 1082G/A  
220 Polymorphisms and patient with CHB [17]. In contrast many experimental and meta-analysis  
221 studies suggest that there is association between IL-6 -174G/C and IL-10- 1082G/A  
222 Polymorphisms and their serum level and immune function of CHB patient with ESRD but all  
223 these finding awaits more verification because we do not know how the intronic variant affect the  
224 expression and level of theses cytokines.

225 We believe that our study has some limitation. Firstly, the sample size is relatively small,  
226 the race subgroups are missed and the collected data are not comprehensive. Finally, the influence  
227 of these promoters polymorphism on gene expression was not directly analyzed.

## 228 **Conclusion**

229 We conclude that the allelic variant of IL-6 -174G/C and IL-10- 1082G/A polymorphisms  
230 and serum levels could not play apart in chronicity of hepatitis B in end stage renal disease patients.

## 231 **Recommendations**

- 232 1. Direct evaluation of gene expression for these promoters polymorphism.
- 233 2. Conduct more studies regarding the intronic variant effect on gene expression and level of  
234 theses cytokines.

## 235 **Acknowledgment**

236 Thanks to Allah almighty who enable me to stand and attend this moments, our thanks  
237 extend to all concerned persons who co-operated with me in this regard.

## 238 **Conflict of interest statement**

239 All authors have no competing interest declared.

## 240 **Funding**

241 This work did not receive any specific grant from funding agencies in the public,  
242 commercial, or not-for-profit sector.

## 243 **Ethical consideration**

244 This study was approved by the Ethical Committee of Scientific Research Deanship  
245 Alneelain University, and informed consent obtained from each participant before sample  
246 collection.

247

248

249

250

251

252

## 253 **References**

- 254 [1] **Lim, J. K., Nguyen, M. H., Kim, W. R., Gish, R., Perumalswami, P., & Jacobson,**  
255 **I. M. (2020).** Prevalence of Chronic Hepatitis B Virus Infection in the United  
256 States. *The American journal of gastroenterology*, *115*(9), 1429–1438.
- 257 [2] **Badawi, M.M., Atif, M., & Mustafa, Y. (2018).** Systematic review and meta-analysis  
258 of HIV, HBV and HCV infection prevalence in Sudan. *Virology Journal*, *15*.
- 259 [3] **Ayatollahi, J., Jahanabadi, S., Sharifyazdi, M., Hemayati, R., Vakili, M., &**  
260 **Shahcheraghi, S.H. (2016).** The Prevalence of Occult Hepatitis B Virus in the  
261 Hemodialysis Patients in Yazd, Iran. *Acta medica Iranica*, *54* (12), 784-787.
- 262 [4] **Saijo, T., Joki, N., Inishi, Y., Muto, M., Saijo, M., & Hase, H. (2015).** Occult  
263 hepatitis B virus infection in hemodialysis patients in Japan. *Therapeutic apheresis and*  
264 *dialysis : official peer-reviewed journal of the International Society for Apheresis, the*  
265 *Japanese Society for Apheresis, the Japanese Society for Dialysis Therapy*, *19*(2), 125–  
266 130.
- 267 [5] **Fontenele, A. M., Filho, N. S., & Ferreira, A. S. (2013).** Occult hepatitis B in patients  
268 on hemodialysis: a review. *Annals of hepatology*, *12*(4), 527–531.
- 269 [6] **Musa, M. D., & Ateya, H. K. (2020).** Prevalence of overt and occult hepatitis B virus  
270 infections among 135 haemodialysis patients attending a haemodialysis centre at Al-  
271 Nasiriyah city, Iraq. *Iranian journal of microbiology*, *12*(5), 475–482.
- 272 [7] **Tunçbilek S. (2014).** Relationship between cytokine gene polymorphisms and chronic  
273 hepatitis B virus infection. *World J Gastroenterol*, *20*:6226–35.
- 274 [8] **Sharif OM, Hassan R, Mohammed Basbaeen AA, Mohmed AH, Ibrahim IK.**  
275 **(2019).** Interleukin-10 (1082G/A) Polymorphism is Associated with Susceptibility of  
276 Acute Myeloid Leukemia Patients in Sudanese Population. *Asian Pac J Cancer Prep*,  
277 *20*(7):1939-1943.
- 278 [9] **Sarhang H. Azeez and Suhaila N. Darogha. (2019).** Proinflammatory cytokine IL-6  
279 -174G/C (rs1800795) gene polymorphism among patients with chronic renal  
280 failure. *Invest Clin.*; *60*(3), 221 - 232.
- 281 [10] **Tan, A., Koh, S., & Bertoletti, A. (2015).** Immune Response in Hepatitis B Virus  
282 Infection. *Cold Spring Harbor perspectives in medicine*, *5*(8), a021428.

- 283 [11] **Zhang PA, LiY, Yang XS. (2006).** Associated study on interleukin 10 gene  
284 promoter polymorphisms related to hepatitis B virus infection in Chinese population.  
285 *Zhonghua Yi Xue Yi Chuan Xue Za Zhi.* 2006; 23(4): 410-14.
- 286 [12] **Girndt, M., Sester, U., Sester, M., Deman, E., Ulrich, C., Kaul, H., & Köhler,**  
287 **H. (2001).** The interleukin-10 promoter genotype determines clinical immune function  
288 in hemodialysis patients. *Kidney international*, 60 (6), 2385-91.
- 289 [13] **Feng Y, Tang Y, Zhou H, Xie K. (2017).** A meta-analysis on correlation between  
290 interleukin-6 -174G/C polymorphism and end-stage renal disease. *Renal Failure*,  
291 39(1):350-356.
- 292 [14] **Buckham TA, McKnight AJ, Benevente D, Courtney AE, Patterson CC,**  
293 **Simmonds M. (2010).** Evaluation of five interleukin genes for association with end-  
294 stage renal disease in white Europeans. *Am J Nephrol*; 32:103–108.
- 295 [15] **Kandil MH, Magour GM, Khalil GI, Maharem DA, Nomair AM. (2013).**  
296 Possible association of interleukin-1beta (-511C/T) and interleukin-6 (-174G/C) gene  
297 polymorphisms with atherosclerosis in end stage renal disease Egyptian patients on  
298 maintenance haemodialysis. *Egypt. J Med Hum Genet*; 14:267–275.
- 299 [16] **Chang, L., Lan, T., Wu, L., Li, C., Yuan, Y., & Liu, Z. (2015).** The association  
300 between three IL-6 polymorphisms and HBV-related liver diseases: a meta-  
301 analysis. *International journal of clinical and experimental medicine*, 8(10), 17036–  
302 17045.
- 303 [17] **Zhang PA, LiY, Yang XS. (2006).** Associated study on interleukin 10 gene  
304 promoter polymorphisms related to hepatitis B virus infection in Chinese population.  
305 *Zhonghua Yi Xue Yi Chuan Xue Za Zhi.* 2006; 23(4): 410-14.
